# Supplementary material for: Short-term cooling, drying, and deceleration of an ice-rich rock glacier
Source: Copernicus journal article supplement (doi:10.5194/tc-18-3141-2024), 2024-07-05
Supplement: Supplementary file 1 [file tc-18-3141-2024-supplement.pdf]

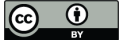

*Supplement of*

## **Short-term cooling, drying, and deceleration of an ice-rich rock glacier**

**Alexander Bast et al.**

*Correspondence to:* Alexander Bast ([alexander.bast@slf.ch](mailto:alexander.bast@slf.ch))

The copyright of individual parts of the supplement might differ from the article licence.

# 1 Supplementary Figures

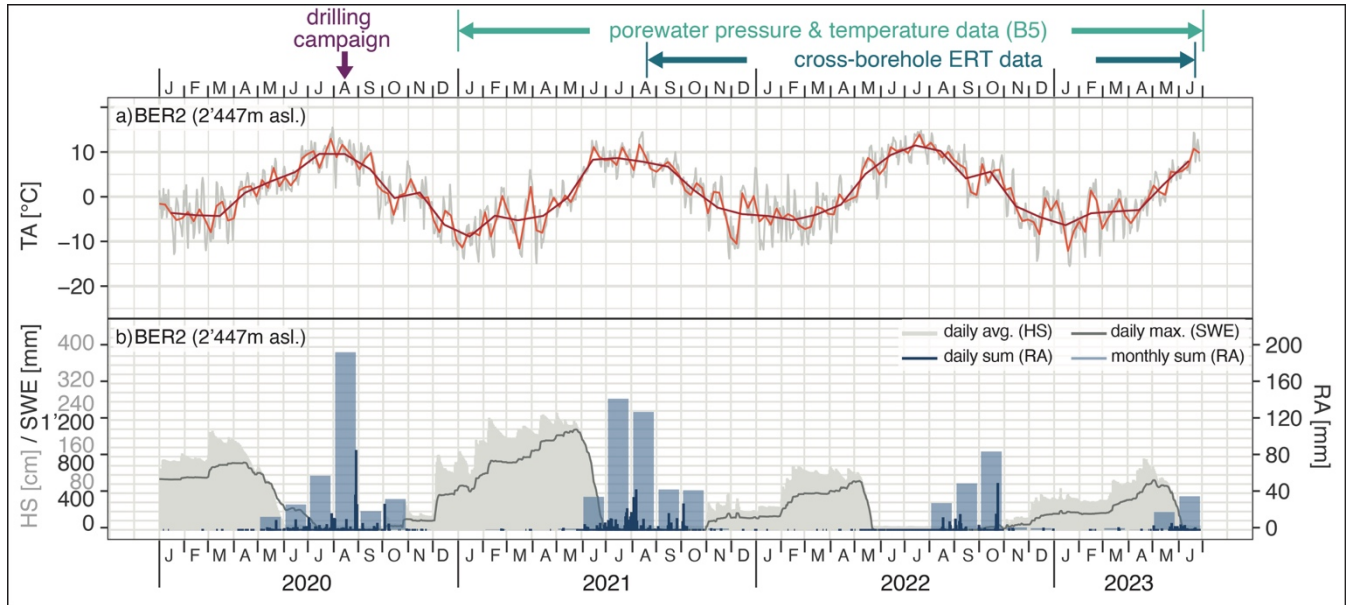

25

Figure S1: Air temperature (TA), snow height (HS), modelled snow water equivalent (SWE), and rainfall (RA) at the IMIS station Valetta (BER2). Legends are embedded in each diagram. Boreholes B3, B4 and B5 were drilled in August 2020 (purple arrow above). The observation periods for pore water pressure, temperature records, and ERT time steps are marked with mint green and light blue arrows, respectively. Note the data gap for RA between 01 May 2022 and 12 August 2022. See Fig. 1d and Tab. S1 for location and detailed station information, Tab. S2 for quarterly and yearly metrics.

30

35

40

## 1 Supplementary Tables

**Table S1: Overview of locations, variables, abbreviations, units, sensors/models, and computed descriptive statistics for weather stations and ground surface temperature measurements (GST) during the observation period from January 2020 to June 2023.**

| Station name (abbreviation)    | Coordinates (x   y), elevation <sup>1)</sup> | Used variables, abbreviation [unit] | Sensor / model                           | Descriptive figures <sup>8)</sup>                                      |
|--------------------------------|----------------------------------------------|-------------------------------------|------------------------------------------|------------------------------------------------------------------------|
| Puoz Bass <sup>2)</sup> (BER3) | 2'790'343   1'146'291,<br>2'625 m asl        | air temperature, TA [°C]            | Rotronic MP102H/HC2 <sup>3)</sup>        | mean ± sd; median ± mad; min; max; frost days; icing days; degree days |
|                                |                                              | rainfall, RA [mm]                   | Campbell Scientific ARG100 <sup>4)</sup> | sum; max; rain days                                                    |
| Valetta <sup>2)</sup> (BER2)   | 2'783'955   1'157'064,<br>2'512 m asl        | height of snowpack, HS [cm]         | Campbell SnowVUE10 <sup>4)</sup>         | mean ± sd; median ± mad; max;                                          |
|                                |                                              | snow water equivalent, SWE [mm]     | SNOWPACK <sup>5)</sup>                   | mean ± sd; median ± mad; max;                                          |
| Schafberg (WS)                 | 2'790'949   1'152'587,<br>2'756 m asl        | air temperature, AT [°C]            | METER Group ATMOS41 <sup>6)</sup>        | <i>see TA and RA for IMIS stations</i>                                 |
|                                |                                              | rainfall, RA [mm]                   |                                          |                                                                        |
| GST01                          | 2790833   1152763,<br>2'723 m asl            | ground surface temperature          | SLF BLE <sup>7)</sup>                    |                                                                        |
| GST02                          | 2790860   1152746,<br>2'732 m asl            | ground surface temperature          | SLF BLE <sup>7)</sup>                    | zero curtain period; zero curtain days; min; max;                      |
| GST03                          | 2790893   1152773,<br>2'738 m asl            | ground surface temperature          | SLF BLE <sup>7)</sup>                    |                                                                        |

45 <sup>1)</sup>swiss grid (CH1903+, LV95; EPSG: 2056); <sup>2)</sup>IMIS snow station (IMIS, 2023); <sup>3)</sup>Rotronic AG, Bassersdorf, CH ([www.rotronic.com](http://www.rotronic.com)); <sup>4)</sup>Campbell Scientific, Inc., Logan, UT, USA ([www.campbellsci.com](http://www.campbellsci.com)); <sup>5)</sup>Bartelt and Lehning, 2002; Lehning *et al.*, 2002a; Lehning *et al.*, 2002b; <sup>6)</sup>METER Group, Inc., Pullman, WA, USA ([www.metergroup.com](http://www.metergroup.com)); <sup>7)</sup>Bluetooth Low Energy (BLE), developed at SLF ([www.slf.ch](http://www.slf.ch)); <sup>8)</sup>mean: arithmetic average; mad: median absolute deviation; others: see definitions in text.

50

55

60 **Table S2: Statistical key figures for the meteorological variables air temperature (TA), rainfall (RA), height of snow (HS), and snow water equivalent (SWE) of the two IMIS stations Motta Bianca (BER2), Puoz Bass (BER3) and the Schafberg weather station (WS). Key figures were calculated for each quarter of each year with available data. Not assigned values (NAs) mainly are due to malfunctioning sensors.**

| <i>BER2 - Motta Bianca</i> |            |       |       |      |       |       |       |       |      |       |       |       |       |      |       |       |       |       |  |
|----------------------------|------------|-------|-------|------|-------|-------|-------|-------|------|-------|-------|-------|-------|------|-------|-------|-------|-------|--|
| key figure                 |            | 2020  |       |      |       |       | 2021  |       |      |       |       | 2022  |       |      |       |       | 2023  |       |  |
|                            |            | Q1    | Q2    | Q3   | Q4    | Y     | Q1    | Q2    | Q3   | Q4    | Y     | Q1    | Q2    | Q3   | Q4    | Y     | Q1    | Q2    |  |
| TA                         | mean       | -4.0  | 3.2   | 8.5  | -1.9  | 1.4   | -6.2  | 1.2   | 7.7  | -1.5  | 0.3   | -4.5  | 4.2   | 8.6  | -0.4  | 2.0   | -4.5  | 2.6   |  |
|                            | sd         | 4.5   | 3.9   | 4.2  | 4.8   | 6.5   | 4.9   | 6.4   | 3.0  | 4.9   | 7.1   | 4.6   | 6.1   | 4.6  | 5.6   | 7.2   | 4.7   | 5.6   |  |
|                            | median     | -4.1  | 2.9   | 8.9  | -1.7  | 1.5   | -6.3  | 0.4   | 7.6  | -0.5  | 0.4   | -4.5  | 4.9   | 9.0  | -0.5  | 1.8   | -4.2  | 3.1   |  |
|                            | mad        | 4.8   | 3.5   | 3.8  | 4.9   | 6.9   | 5.3   | 6.4   | 3.0  | 4.6   | 8.0   | 4.9   | 7.1   | 3.9  | 6.3   | 8.6   | 4.9   | 6.0   |  |
|                            | max        | 10.4  | 15.9  | 18.4 | 12.0  | 18.4  | 12.3  | 16.2  | 17.5 | 9.4   | 17.5  | 8.7   | 16.6  | 18.8 | 12.4  | 18.8  | 9.0   | 18.1  |  |
|                            | min        | -16.0 | -14.8 | -6.2 | -14.2 | -16.0 | -19.2 | -16.2 | -0.9 | -15.4 | -19.2 | -14.9 | -13.5 | -3.8 | -15.6 | -15.6 | -16.6 | -11.4 |  |
|                            | frost days | 85    | 42    | 6    | 77    | 210   | 88    | 59    | 3    | 75    | 225   | 87    | 36    | 14   | 58    | 195   | 88    | 43    |  |
|                            | icing days | 50    | 4     | 3    | 36    | 93    | 67    | 19    | 0    | 33    | 119   | 56    | 9     | 0    | 39    | 95    | 58    | 20    |  |
|                            | 5°C-days   | 9     | 61    | 85   | 21    | 176   | 8     | 41    | 89   | 22    | 160   | 8     | 57    | 80   | 29    | 174   | 7     | 53    |  |
|                            | 10°C-days  | 1     | 15    | 61   | 1     | 78    | 2     | 27    | 48   | 0     | 75    | 0     | 39    | 63   | 10    | 112   | 0     | 21    |  |
| 15°C-days                  | 0          | 2     | 14    | 0    | 16    | 0     | 2     | 8     | 0    | 10    | 0     | 6     | 22    | 0    | 28    | 0     | 4     |       |  |
| RA                         | sum        | 0     | 42    | 274  | 34    | 350   | 0     | 37    | 316  | 45    | 398   | 0     | NA    | NA   | 90    | NA    | 2     | 56    |  |
|                            | daily max  | 0     | 10    | 86   | 27    | 86    | 0     | 7     | 43   | 28    | 43    | 0     | NA    | NA   | 50    | NA    | 2     | 15    |  |
|                            | days       | 0     | 21    | 45   | 4     | 70    | 1     | 14    | 41   | 6     | 62    | 0     | NA    | NA   | 12    | NA    | 1     | 23    |  |
| HS                         | mean       | 166   | 85    | 7    | 57    | 79    | 192   | 188   | 7    | 32    | 104   | 94    | 64    | 6    | 29    | 48    | 72    | 78    |  |
|                            | sd         | 23    | 67    | 4    | 52    | 72    | 32    | 71    | 1    | 20    | 95    | 36    | 55    | 1    | 24    | 48    | 15    | 51    |  |
|                            | median     | 154   | 100   | 7    | 30    | 34    | 199   | 220   | 7    | 39    | 53    | 115   | 68    | 6    | 23    | 25    | 65    | 101   |  |
|                            | mad        | 10    | 107   | 1    | 28    | 43    | 27    | 27    | 1    | 19    | 71    | 24    | 90    | 1    | 25    | 29    | 6     | 46    |  |
|                            | max        | 219   | 194   | 180  | 166   | 219   | 253   | 262   | 10   | 85    | 262   | 144   | 141   | 11   | 80    | 144   | 116   | 160   |  |
| SWE                        | mean       | 607   | 454   | 12   | 165   | 309   | 654   | 843   | 0    | 82    | 329   | 285   | 246   | 0    | 70    | 149   | 205   | 294   |  |
|                            | sd         | 66    | 209   | 31   | 143   | 269   | 128   | 299   | 0    | 63    | 397   | 114   | 226   | 1    | 52    | 175   | 45    | 198   |  |
|                            | median     | 572   | 502   | 0    | 101   | 232   | 734   | 975   | 0    | 122   | 139   | 323   | 331   | 0    | 53    | 56    | 183   | 342   |  |
|                            | mad        | 31    | 334   | 0    | 90    | 344   | 87    | 134   | 0    | 43    | 206   | 112   | 292   | 0    | 37    | 83    | 11    | 204   |  |
|                            | max        | 730   | 735   | 140  | 432   | 735   | 831   | 1097  | 0    | 182   | 1097  | 403   | 534   | 15   | 176   | 534   | 326   | 543   |  |
| <i>BER3 - Puoz Bass</i>    |            |       |       |      |       |       |       |       |      |       |       |       |       |      |       |       |       |       |  |
| key figure                 |            | 2020  |       |      |       |       | 2021  |       |      |       |       | 2022  |       |      |       |       | 2023  |       |  |
|                            |            | Q1    | Q2    | Q3   | Q4    | Y     | Q1    | Q2    | Q3   | Q4    | Y     | Q1    | Q2    | Q3   | Q4    | Y     | Q1    | Q2    |  |
| TA                         | mean       | -4.6  | 2.4   | 7.6  | -2.4  | 0.8   | -6.8  | 0.4   | 6.9  | -2.3  | -0.4  | -5.2  | 3.5   | 7.7  | -1.0  | 1.3   | -5.4  | 1.8   |  |
|                            | sd         | 4.7   | 3.8   | 4.5  | 5.0   | 6.5   | 5.1   | 6.6   | 3.3  | 5.0   | 7.1   | 4.7   | 6.2   | 4.7  | 5.8   | 7.2   | 4.9   | 5.7   |  |
|                            | median     | -4.5  | 2.1   | 8.0  | -1.9  | 0.9   | -7.3  | -0.3  | 6.7  | -1.4  | -0.2  | -5.2  | 4.1   | 8.1  | -1.1  | 1.2   | -5.1  | 2.2   |  |
|                            | mad        | 5.3   | 3.3   | 4.2  | 5.3   | 6.7   | 5.7   | 6.5   | 3.4  | 4.5   | 7.6   | 4.8   | 7.0   | 4.0  | 6.7   | 8.5   | 5.1   | 6.1   |  |
|                            | max        | 6.1   | 14.3  | 17.4 | 9.7   | 17.4  | 9.5   | 16.4  | 16.5 | 7.6   | 16.5  | 7.0   | 17.0  | 18.0 | 12.0  | 18.0  | 8.4   | 16.9  |  |
|                            | min        | -16.9 | -11.7 | -7.2 | -15.5 | -16.9 | -18.2 | -17.9 | -1.4 | -16.3 | -18.2 | -15.3 | -15.6 | -5.1 | -17.0 | -17.0 | -17.8 | -14.1 |  |
|                            | frost days | 87    | 55    | 10   | 78    | 230   | 87    | 59    | 5    | 80    | 231   | 88    | 44    | 13   | 60    | 205   | 88    | 46    |  |
|                            | icing days | 50    | 2     | 3    | 39    | 94    | 66    | 24    | 0    | 35    | 125   | 59    | 9     | 1    | 41    | 110   | 57    | 21    |  |
|                            | 5°C-days   | 4     | 50    | 83   | 18    | 155   | 6     | 38    | 87   | 12    | 143   | 6     | 57    | 80   | 30    | 173   | 7     | 49    |  |
|                            | 10°C-days  | 0     | 12    | 57   | 0     | 69    | 0     | 17    | 43   | 0     | 60    | 0     | 33    | 61   | 4     | 98    | 0     | 17    |  |
| 15°C-days                  | 0          | 0     | 13    | 0    | 13    | 0     | 3     | 4     | 0    | 7     | 0     | 5     | 16    | 0    | 21    | 0     | 2     |       |  |
| RA                         | sum        | 2     | 49    | 293  | 19    | 362   | 0     | 4     | 111  | 12    | 126   | 0     | 123   | 180  | 19    | 322   | 0     | 96    |  |

|     |           |     |     |    |     |     |     |     |    |     |     |     |     |     |    |     |     |     |
|-----|-----------|-----|-----|----|-----|-----|-----|-----|----|-----|-----|-----|-----|-----|----|-----|-----|-----|
|     | daily max | 2   | 13  | 54 | 11  | 54  | 0   | 1   | 23 | 5   | 23  | 0   | 18  | 21  | 7  | 21  | 0   | 22  |
|     | days      | 1   | 15  | 40 | 6   | 62  | 0   | 5   | 31 | 6   | 42  | 1   | 26  | 32  | 9  | 68  | 0   | 22  |
| HS  | mean      | 91  | 32  | 6  | 33  | 40  | 109 | 70  | 6  | 30  | 53  | 49  | 23  | 6   | 16 | 23  | 44  | 41  |
|     | sd        | 15  | 34  | 1  | 29  | 39  | 17  | 37  | 1  | 19  | 45  | 4   | 21  | 3   | 11 | 20  | 9   | 30  |
|     | median    | 86  | 16  | 6  | 18  | 18  | 113 | 88  | 6  | 36  | 45  | 49  | 6   | 6   | 14 | 13  | 42  | 52  |
|     | mad       | 15  | 17  | 0  | 18  | 19  | 10  | 16  | 0  | 18  | 58  | 4   | 2   | 0   | 13 | 11  | 3   | 41  |
|     | max       | 131 | 106 | 16 | 104 | 131 | 154 | 125 | 9  | 67  | 154 | 60  | 85  | 178 | 37 | 178 | 78  | 101 |
| SWE | mean      | NA  | NA  | 2  | 92  | NA  | 328 | 301 | 0  | 68  | 173 | 134 | 69  | 0   | 35 | 59  | 98  | 132 |
|     | sd        | NA  | NA  | 4  | 75  | NA  | 59  | 164 | 0  | 48  | 169 | 8   | 77  | 1   | 20 | 64  | 25  | 103 |
|     | median    | NA  | NA  | 0  | 57  | NA  | 369 | 395 | 0  | 90  | 114 | 132 | 0   | 0   | 29 | 28  | 90  | 149 |
|     | mad       | NA  | NA  | 0  | 48  | NA  | 15  | 33  | 0  | 40  | 169 | 11  | 0   | 0   | 16 | 41  | 10  | 128 |
|     | max       | NA  | NA  | 14 | 220 | NA  | 382 | 436 | 0  | 132 | 436 | 146 | 182 | 13  | 71 | 182 | 150 | 299 |

WS - Schafberg

| key figure |            | 2022 |       |     | 2023  |       |
|------------|------------|------|-------|-----|-------|-------|
|            |            | Q3   | Q4    | Y   | Q1    | Q2    |
| TA         | mean       | NA   | -1.7  | NA  | -6.5  | 0.6   |
|            | sd         | NA   | 5.7   | NA  | 5.0   | 5.9   |
|            | median     | NA   | -1.2  | NA  | -6.0  | 1.2   |
|            | mad        | NA   | 6.5   | NA  | 5.3   | 6.2   |
|            | max        | NA   | 12.0  | NA  | 6.3   | 17.2  |
|            | min        | NA   | -19.3 | NA  | -19.4 | -15.6 |
|            | frost days | NA   | 64.0  | NA  | 90.0  | 52.0  |
|            | icing days | NA   | 42.0  | NA  | 69.0  | 28.0  |
|            | 5°C-days   | NA   | 25.0  | NA  | 1.0   | 43.0  |
|            | 10°C-days  | NA   | 4.0   | NA  | 0.0   | 14.0  |
| 15°C-days  | NA         | 0.0  | NA    | 0.0 | 4.0   |       |
| RA         | sum        | NA   | 4     | NA  | 0     | 42    |
|            | daily max  | NA   | 1     | NA  | 0     | 2     |
|            | days       | NA   | 8     | NA  | 15    | 26    |

65 Mean: arithmetic average; sd: standard deviation; mad: median absolute deviation; frost days (T<sub>Amin</sub> < 0 °C); icing days (T<sub>Amax</sub> < 0 °C); 5 °C-days, 10 °C-days, and 15 °C days (T<sub>Amax</sub> > 5°C, T<sub>Amax</sub> > 10 °C, and T<sub>Amax</sub> > 15 °C, respectively); rain days (RA > 0 mm); daily max: RA of the day with the RA maximum of the corresponding quarter;

70

75

**Table S3: Spring zero curtain (ZC) periods, number of days with ZC and maximum and minimum ground surface temperature (GST) values for the three GST sensors GST01, GST02 and GST03.**

|                          |                | GST01            | GST02                | GST03                 |                      |
|--------------------------|----------------|------------------|----------------------|-----------------------|----------------------|
| spring zero curtain (ZC) | winter 2019/20 | ZC period        | 15 Apr - 14 May 2020 | 10 Apr - 07 May 2020  | 26 Apr - 21 May 2020 |
|                          |                | ZC days          | 29                   | 27                    | 25                   |
|                          | winter 2020/21 | ZC period        | 11 May - 19 Jun 2021 | 09 May - 14 June 2021 | 15 May - 19 Jun 2021 |
|                          |                | ZC days          | 39                   | 36                    | 35                   |
|                          | winter 2021/22 | ZC period        | 07 May - 12 May 2022 | 02 May - 11 May 2022  | 21 Apr - 14 May 2022 |
|                          |                | ZC days          | 5                    | 9                     | 23                   |
|                          | winter 2022/23 | ZC period        | 20 May - 10 Jun 2023 | 30 Apr - 06 June 2023 | 29 Apr - 01 Jun 2023 |
|                          |                | ZC days          | 21                   | 37                    | 33                   |
| GST <sub>max</sub>       | summer 2020    | date             | 09 Aug 2020          | 09 Aug 2020           | 30 Jul 2020          |
|                          |                | temperature [°C] | 15.1                 | 15.4                  | 13.1                 |
|                          | summer 2021    | date             | 15 Aug 2021          | 14 Aug 2021           | 15 Aug 2021          |
|                          |                | temperature [°C] | 15.7                 | 16.2                  | 14.3                 |
|                          | summer 2022    | date             | 22 Jul 2022          | 21 Jul 2022           | 22 Jul 2022          |
|                          |                | temperature [°C] | 16.5                 | 16.1                  | 15.6                 |
| GST <sub>min</sub>       | winter 2020/21 | date             | 12 Mar 2021          | 14 Oct 2020           | 11 Jan 2021          |
|                          |                | temperature [°C] | -10.9                | -3.7                  | -11.7                |
|                          | winter 2021/22 | date             | 29 Nov 2021          | 07 Mar 2022           | 29 Nov 2021          |
|                          |                | temperature [°C] | -3.6                 | -7.6                  | -13.9                |
|                          | winter 2022/23 | date             | 19 Nov 2022          | 12 Feb 2023           | 22 Jan 2023          |
|                          |                | temperature [°C] | -9.5                 | -3.8                  | -14.2                |

80

85

90

**Table S4: Results of the robust non-parametric Kruskal-Wallis  $H$ -test statistic and eta-squared measure to assess significance and strength of the relation for ground temperature, piezometric pressure, resistivity, and horizontal displacement velocity data.**

| variable             | n     | Kruskal-Wallis H-test statistic |    |           | eta-squared measure $\eta_H^2$ |           |
|----------------------|-------|---------------------------------|----|-----------|--------------------------------|-----------|
|                      |       | statistic                       | df | p-value   | effect size                    | magnitude |
| ground temperature   | 7170  | 4639                            | 29 | 0         | 0.646                          | large     |
| piezometric pressure | 5742  | 673                             | 29 | 3.64E-123 | 0.113                          | moderate  |
| resistivity          | 36156 | 2379                            | 22 | 0         | 0.0652                         | moderate  |
| velocity             | 1330  | 696                             | 4  | 2.90E-149 | 0.522                          | large     |

n: tested sample size; df: degrees of freedom;

95

100

105

110

115

**Table S5: Results of the Dunn's test (pairwise comparisons) for ground temperature, piezometric pressure, resistivity, and horizontal displacement velocity data. The differences between the years were tested for each month. Significant adjusted p-values are in bold and italic. Note: Horizontal velocities are measured only once a year (in July).**

| variable             | group 1         | group 2         | p - value          | adjusted p-value   |
|----------------------|-----------------|-----------------|--------------------|--------------------|
| ground temperature   | Jan 2021        | Jan 2022        | 0.04242            | 1                  |
|                      | Jan 2021        | Jan 2023        | 0.00183            | 0.79437            |
|                      | Jan 2022        | Jan 2023        | 0.27670            | 1                  |
|                      | <i>Feb 2021</i> | <i>Feb 2022</i> | <i>3.92E-24</i>    | <i>1.70E-21</i>    |
|                      | <i>Feb 2021</i> | <i>Feb 2023</i> | <i>6.64E-30</i>    | <i>2.89E-27</i>    |
|                      | Feb 2022        | Feb 2023        | 0.22016            | 1                  |
|                      | <i>Mar 2021</i> | <i>Mar 2022</i> | <i>1.71E-17</i>    | <i>7.42E-15</i>    |
|                      | <i>Mar 2021</i> | <i>Mar 2023</i> | <i>6.59E-17</i>    | <i>2.87E-14</i>    |
|                      | Mar 2022        | Mar 2023        | 0.86969            | 1                  |
|                      | <i>Apr 2021</i> | <i>Apr 2022</i> | <i>3.00E-09</i>    | <i>1.31E-06</i>    |
|                      | <i>Apr 2021</i> | <i>Apr 2023</i> | <i>1.31E-07</i>    | <i>5.69E-05</i>    |
|                      | Apr 2022        | Apr 2023        | 0.51337            | 1                  |
|                      | May 2021        | May 2022        | 0.31214            | 1                  |
|                      | May 2021        | May 2023        | 0.02706            | 1                  |
|                      | May 2022        | May 2023        | 0.23019            | 1                  |
|                      | Jun 2021        | Jun 2022        | 0.58446            | 1                  |
|                      | Jun 2021        | Jun 2023        | 0.47477            | 1                  |
|                      | Jun 2022        | Jun 2023        | 0.21444            | 1                  |
|                      | Jul 2021        | Jul 2022        | 0.03464            | 1                  |
|                      | Aug 2021        | Aug 2022        | 0.07277            | 1                  |
| Sep 2021             | Sep 2022        | 0.11389         | 1                  |                    |
| Oct 2021             | Oct 2022        | 0.20412         | 1                  |                    |
| Nov 2021             | Nov 2022        | 0.43566         | 1                  |                    |
| Dec 2021             | Dec 2022        | 0.32556         | 1                  |                    |
| Piezometric pressure | <i>Jan 2021</i> | <i>Jan 2022</i> | <i>1.7867E-10</i>  | <i>7.77213E-08</i> |
|                      | <i>Jan 2021</i> | <i>Jan 2023</i> | <i>1.60472E-21</i> | <i>6.98052E-19</i> |
|                      | Jan 2022        | Jan 2023        | 0.00164            | 0.71198            |
|                      | <i>Feb 2021</i> | <i>Feb 2022</i> | <i>1.64323E-09</i> | <i>7.14806E-07</i> |
|                      | <i>Feb 2021</i> | <i>Feb 2023</i> | <i>7.47292E-22</i> | <i>3.25072E-19</i> |
|                      | Feb 2022        | Feb 2023        | 0.00035            | 0.15101            |
|                      | <i>Mar 2021</i> | <i>Mar 2022</i> | <i>1.14087E-11</i> | <i>4.9628E-09</i>  |
|                      | <i>Mar 2021</i> | <i>Mar 2023</i> | <i>8.62367E-28</i> | <i>3.75129E-25</i> |
|                      | <i>Mar 2022</i> | <i>Mar 2023</i> | <i>2.06753E-05</i> | <i>0.00899</i>     |
|                      | <i>Apr 2021</i> | <i>Apr 2022</i> | <i>3.60128E-08</i> | <i>1.56656E-05</i> |
|                      | <i>Apr 2021</i> | <i>Apr 2023</i> | <i>1.2534E-24</i>  | <i>5.45229E-22</i> |
|                      | <i>Apr 2022</i> | <i>Apr 2023</i> | <i>2.19E-06</i>    | <i>0.00095</i>     |



|                 |                  |                  |                    |                    |
|-----------------|------------------|------------------|--------------------|--------------------|
|                 | <i>May 2021</i>  | <i>May 2022</i>  | <i>3.93481E-06</i> | <i>0.00171</i>     |
|                 | <i>May 2021</i>  | <i>May 2023</i>  | <i>9.03398E-18</i> | <i>3.92978E-15</i> |
|                 | <i>May 2022</i>  | <i>May 2023</i>  | <i>7.16215E-05</i> | <i>0.03116</i>     |
|                 | <i>Jun 2021</i>  | <i>Jun 2022</i>  | <i>4.81904E-06</i> | <i>0.00210</i>     |
|                 | <i>Jun 2021</i>  | <i>Jun 2023</i>  | <i>2.11723E-19</i> | <i>9.20994E-17</i> |
|                 | <i>Jun 2022</i>  | <i>Jun 2023</i>  | <i>9.22823E-06</i> | <i>0.00401</i>     |
|                 | <i>Jul 2021</i>  | <i>Jul 2022</i>  | <i>0.00014</i>     | <i>0.06134</i>     |
|                 | <i>Aug 2021</i>  | <i>Aug 2022</i>  | <i>0.00017</i>     | <i>0.07235</i>     |
|                 | <i>Sep 2021</i>  | <i>Sep 2022</i>  | <i>0.00030</i>     | <i>0.12942</i>     |
|                 | <i>Oct 2021</i>  | <i>Oct 2022</i>  | <i>0.00055</i>     | <i>0.23790</i>     |
|                 | <i>Nov 2021</i>  | <i>Nov 2022</i>  | <i>0.00030</i>     | <i>0.13192</i>     |
|                 | <i>Dec 2021</i>  | <i>Dec 2022</i>  | <i>0.00059</i>     | <i>0.25688</i>     |
| resistivity     | <i>Jan 2022</i>  | <i>Jan 2023</i>  | <i>0.05772</i>     | <i>1</i>           |
|                 | <i>Feb 2022</i>  | <i>Feb 2023</i>  | <i>0.06445</i>     | <i>1</i>           |
|                 | <i>Mar 2022</i>  | <i>Mar 2023</i>  | <i>0.00266</i>     | <i>0.67252</i>     |
|                 | <i>Apr 2022</i>  | <i>Apr 2023</i>  | <i>1.58E-08</i>    | <i>3.99E-06</i>    |
|                 | <i>May 2022</i>  | <i>May 2023</i>  | <i>1.10E-22</i>    | <i>2.80E-20</i>    |
|                 | <i>Jun 2022</i>  | <i>Jun 2023</i>  | <i>0.05503</i>     | <i>1</i>           |
|                 | <i>Aug 2021</i>  | <i>Aug 2022</i>  | <i>0.04858</i>     | <i>1</i>           |
|                 | <i>Sept 2021</i> | <i>Sept 2022</i> | <i>0.86761</i>     | <i>1</i>           |
|                 | <i>Oct 2021</i>  | <i>Oct 2022</i>  | <i>0.77475</i>     | <i>1</i>           |
|                 | <i>Nov 2021</i>  | <i>Nov 2022</i>  | <i>0.50108</i>     | <i>1</i>           |
|                 | <i>Dec 2021</i>  | <i>Dec 2022</i>  | <i>0.49742</i>     | <i>1</i>           |
|                 | velocities       | <i>Jul 2019</i>  | <i>Jul 2020</i>    | <i>3.71807E-20</i> |
| <i>Jul 2020</i> |                  | <i>Jul 2021</i>  | <i>7.08764E-55</i> | <i>7.08764E-54</i> |
| <i>Jul 2021</i> |                  | <i>Jul 2022</i>  | <i>6.78298E-38</i> | <i>6.78298E-37</i> |
| <i>Jul 2022</i> |                  | <i>Jul 2023</i>  | <i>5.16177E-12</i> | <i>5.16177E-11</i> |

group1: year 1 in comparison; group2: year 2 in comparison; adjusted p-value based on the Bonferroni correction.
